# Supplementary material for: Biomechanics of the peafowl’s crest reveals frequencies tuned to social displays
Source: PubMed Central journal article supplement (PMC6261573; doi:10.1371/journal.pone.0207247), 2018-11-28
Supplement: pone.0207247.s002.pdf [file pone.0207247.s002.pdf]

**S1 Table. Individual feathers used in the vibrational resonant measurements.** These values are provided for comparison with data shown in Fig. 3 for peafowl crests.

| Species                 | Feather type           | Rachis length (cm)<br>(+/- 0.05 cm 95% CI) |
|-------------------------|------------------------|--------------------------------------------|
| Indian peafowl male     | Body contour semiplume | 3.94                                       |
| Indian peafowl male     | Body contour semiplume | 5.95                                       |
| Indian peafowl male     | Wing covert            | 10.67                                      |
| Indian peafowl male     | mantle                 | 5.15                                       |
| Indian peafowl male     | mantle                 | 7.00                                       |
| Indian peafowl male     | train eyespot          | 11.50                                      |
| Victoria crowned pigeon | crest                  | 6.30                                       |
| Victoria crowned pigeon | crest                  | 12.50                                      |
| Himalayan monal         | crest                  | 5.50                                       |
| Golden pheasant         | crest                  | 5.00                                       |
| Yellow-crested cockatoo | crest                  | 10.00                                      |
