# Supplementary material for: Biomechanics of the peafowl’s crest reveals frequencies tuned to social displays
Source: PubMed Central journal article supplement (PMC6261573; doi:10.1371/journal.pone.0207247), 2018-11-28
Supplement: pone.0207247.s003.pdf [file pone.0207247.s003.pdf]

**S2 Table. Sound pressure levels (SPL) of avian wingbeats during flight and wing-beating displays measured in previous studies.**

| Bird species                                                         | SPL (dB)                                                                 | Distance (m) | Reference                                                                                                                                                                             |
|----------------------------------------------------------------------|--------------------------------------------------------------------------|--------------|---------------------------------------------------------------------------------------------------------------------------------------------------------------------------------------|
| Eastern phoebes,<br><i>Sayornis phoebe</i>                           | 64-66 dB SPL at 1 kHz                                                    | 1.2 m        | Fournier, J.P., Dawson, J.W., Mikhail, A., & Yack, J.E. (2013). If a bird flies in the forest, does an insect hear it? <i>Biology letters</i> 9(5): 20130319.                         |
| Black-capped chickadees,<br><i>Poecile atricapillus</i>              | 54-60 dB SPL at 25 kHz                                                   | 1.2 m        | Fournier, J.P., Dawson, J.W., Mikhail, A., & Yack, J.E. (2013). If a bird flies in the forest, does an insect hear it? <i>Biology letters</i> 9(5): 20130319.                         |
| Crested pigeons,<br><i>Ocyphaps lophotes</i>                         | ≤ 67.6 dB SPL                                                            | 1.0 m        | Hingee, M. & Magrath, R.D. (2009) Flights of fear: a mechanical wing whistle sounds the alarm in a flocking bird. <i>Proceedings of the Royal Society of London B</i> : rspb20091110. |
| Ruffed grouse,<br><i>Bonasa umbellus</i><br>(a wing-beating display) | 66.2 dB SPL, bandwidth 300 Hz to 8 kHz, frequency weighting not reported | 1.0 m        | Garcia, M., Charrier, I., & Iwaniuk, A.N. (2012) Directionality of the drumming display of the ruffed grouse. <i>The Condor</i> 114(3): 500-506.                                      |
