# Supplementary material for: Biomechanics of the peafowl’s crest reveals frequencies tuned to social displays
Source: PubMed Central journal article supplement (PMC6261573; doi:10.1371/journal.pone.0207247), 2018-11-28
Supplement: pone.0207247.s004.pdf [file pone.0207247.s004.pdf]

**S3 Table. Wingflap frequencies of adult peacocks during level and ascending flight.**

| <b>Source</b>                                                                                                                        | <b>Number of individuals</b> | <b>Wingflap frequency (Hz)</b> |
|--------------------------------------------------------------------------------------------------------------------------------------|------------------------------|--------------------------------|
| <a href="https://www.youtube.com/watch?v=HvY_1wFSFsQ">https://www.youtube.com/watch?v=HvY_1wFSFsQ</a><br>accessed September 28, 2017 | 1                            | 4.92                           |
| <a href="https://www.youtube.com/watch?v=7gxQwm4MWns">https://www.youtube.com/watch?v=7gxQwm4MWns</a><br>accessed September 28, 2017 | 1                            | 4.16                           |
| <a href="https://www.youtube.com/watch?v=U55iMIiI_k0">https://www.youtube.com/watch?v=U55iMIiI_k0</a><br>accessed September 28, 2017 | 1                            | 6.43                           |
| <a href="https://www.youtube.com/watch?v=kZe0jLkeMuk">https://www.youtube.com/watch?v=kZe0jLkeMuk</a><br>accessed September 28, 2017 | 1                            | 4.42                           |
| <a href="https://www.youtube.com/watch?v=FrMQs7OwWC8">https://www.youtube.com/watch?v=FrMQs7OwWC8</a><br>accessed September 28, 2017 | 3                            | 6.36<br>6.00<br>5.55           |
| <a href="https://www.youtube.com/watch?v=A5xSgaXDkTY">https://www.youtube.com/watch?v=A5xSgaXDkTY</a><br>accessed September 28, 2017 | 2                            | 5.81<br>6.15                   |
