# Supplementary material for: Biomechanics of the peafowl’s crest reveals frequencies tuned to social displays
Source: PubMed Central journal article supplement (PMC6261573; doi:10.1371/journal.pone.0207247), 2018-11-28
Supplement: pone.0207247.s005.pdf [file pone.0207247.s005.pdf]

**S4 Table. Symbols used to indicate different crest samples in Figures 2 and 3 of the main text.**

| Symbol | Sample ID | Sex             |
|--------|-----------|-----------------|
| ○      | Crest 07  | female (peahen) |
| △      | Crest 08  | female          |
| +      | Crest 10  | female          |
| ×      | Crest 11  | female          |
| ◇      | Crest 12  | female          |
| ▽      | Crest 13  | female          |
| ■      | Crest 14  | female          |
| *      | Crest 15  | female          |
| ○      | Crest 01  | male (peacock)  |
| △      | Crest 02  | male            |
| +      | Crest 03  | male            |
| ×      | Crest 04  | male            |
| ◇      | Crest 05  | male            |
| ▽      | Crest 06  | male            |
| ■      | Crest 09  | male            |
