# Supplementary material for: Biomechanics of the peafowl’s crest reveals frequencies tuned to social displays
Source: PubMed Central journal article supplement (PMC6261573; doi:10.1371/journal.pone.0207247), 2018-11-28
Supplement: pone.0207247.s006.pdf [file pone.0207247.s006.pdf]

**S5 Table. Best-fit models of  $f_r$  and  $Q$  in the analysis of the vibrational dynamics measurements.**

| Response | Fixed-effect                            | Estimate (SE) | t     | p        |
|----------|-----------------------------------------|---------------|-------|----------|
| $f_r$    | Orientation (in-plane vs. out-of-plane) | -2.22 (0.23)  | -9.46 | < 0.0001 |
|          | Sex (male vs. female)                   | 0.26 (1.49)   | 0.18  | 0.86     |
|          | Top area                                | -0.82 (0.46)  | -1.78 | 0.10     |
| $Q$      | Orientation (in-plane vs. out-of-plane) | -1.26 (0.25)  | -4.94 | < 0.0001 |
|          | Sex (male vs. female)                   | 1.85 (0.49)   | 3.71  | 0.005    |
|          | Top area                                | -0.37 (0.15)  | -2.40 | 0.04     |
