# Supplementary material for: Biomechanics of the peafowl’s crest reveals frequencies tuned to social displays
Source: PubMed Central journal article supplement (PMC6261573; doi:10.1371/journal.pone.0207247), 2018-11-28
Supplement: pone.0207247.s007.pdf [file pone.0207247.s007.pdf]

**S6 Table. Species in which both sexes have crests of flexible feathers and the male also performs a shaking display.** There are many bird species wherein both sexes have a flexible feather crest. To understand the taxonomic breadth of birds that have shaking displays in addition to the crest, we used natural history resources including photos, videos and descriptive accounts of appearance and behavior. We documented at least 35 species across 10 different orders in which the females exhibit flexible feather crests and the males are known to perform shaking displays.

| Order             | Species                             | Common name                |
|-------------------|-------------------------------------|----------------------------|
| Accipitriformes   | <i>Sagittarius serpentarius</i>     | Secretary bird             |
| Cariamiformes     | <i>Cariama cristata</i>             | Crested cariana            |
| Columbiformes     | <i>Geophaps plumifera</i>           | Spinifex pigeon            |
|                   | <i>Goura cristata</i>               | Western crowned pigeon     |
|                   | <i>Goura scheepmakeri</i>           | Southern crowned pigeon    |
|                   | <i>Goura victoria</i>               | Victoria crowned pigeon    |
|                   | <i>Ocyphaps lophotes</i>            | Crested pigeon             |
| Galliformes       | <i>Afropavo congensis</i>           | Congo peafowl              |
|                   | <i>Argusianus argus</i>             | Great argus                |
|                   | <i>Colinus cristatus</i>            | Crested bobwhite           |
|                   | <i>Leipoa ocellata</i>              | Malleefowl                 |
|                   | <i>Lophophorus impejanus</i>        | Himalayan monal            |
|                   | <i>Lophura ignita</i>               | Crested fireback           |
|                   | <i>Lophura leucomelanos</i>         | Kalij pheasant             |
|                   | <i>Pavo cristatus</i>               | Indian peafowl             |
|                   | <i>Pavo muticus</i>                 | Green peafowl              |
|                   | <i>Polyplectron bicalcaratum</i>    | Gray peacock pheasant      |
|                   | <i>Polyplectron malacense</i>       | Malayan peacock pheasant   |
|                   | <i>Polyplectron napoleonis</i>      | Palawan peacock pheasant   |
|                   | <i>Polyplectron schleiermacheri</i> | Bornean peacock pheasant   |
|                   | <i>Rheinardia ocellata</i>          | Crested argus              |
|                   | <i>Tetrao urogallus</i>             | Western capercaillie       |
| Gruiformes        | <i>Balearica pavonina</i>           | Black crowned crane        |
|                   | <i>Balearica regulorum</i>          | Gray crowned crane         |
| Opisthocomiformes | <i>Opisthocomus hoazin</i>          | Hoatzin                    |
| Passeriformes     | <i>Baeolophus bicolor</i>           | Tufted titmouse            |
|                   | <i>Cardinalis cardinalis</i>        | Northern cardinal          |
|                   | <i>Onychorhynchus coronatus</i>     | Royal flycatcher           |
|                   | <i>Prionops plumatus</i>            | White-crested helmetshrike |
|                   | <i>Pycnonotus jocosus</i>           | Red-whiskered bulbul       |
|                   | <i>Rupicola peruvianus</i>          | Andean cock-of-the-rock    |
| Pelicaniformes    | <i>Phalacrocorax auritus</i>        | Double-crested cormorant   |
|                   | <i>Phalacrocorax carbo</i>          | Great cormorant            |
| Suliformes        | <i>Anhinga anhinga</i>              | Anhinga                    |
| Tinamiformes      | <i>Eudromia elegans</i>             | Elegant crested tinamou    |
