# Supplementary material for: Biomechanics of the peafowl’s crest reveals frequencies tuned to social displays
Source: PubMed Central journal article supplement (PMC6261573; doi:10.1371/journal.pone.0207247), 2018-11-28
Supplement: pone.0207247.s010.pdf [file pone.0207247.s010.pdf]

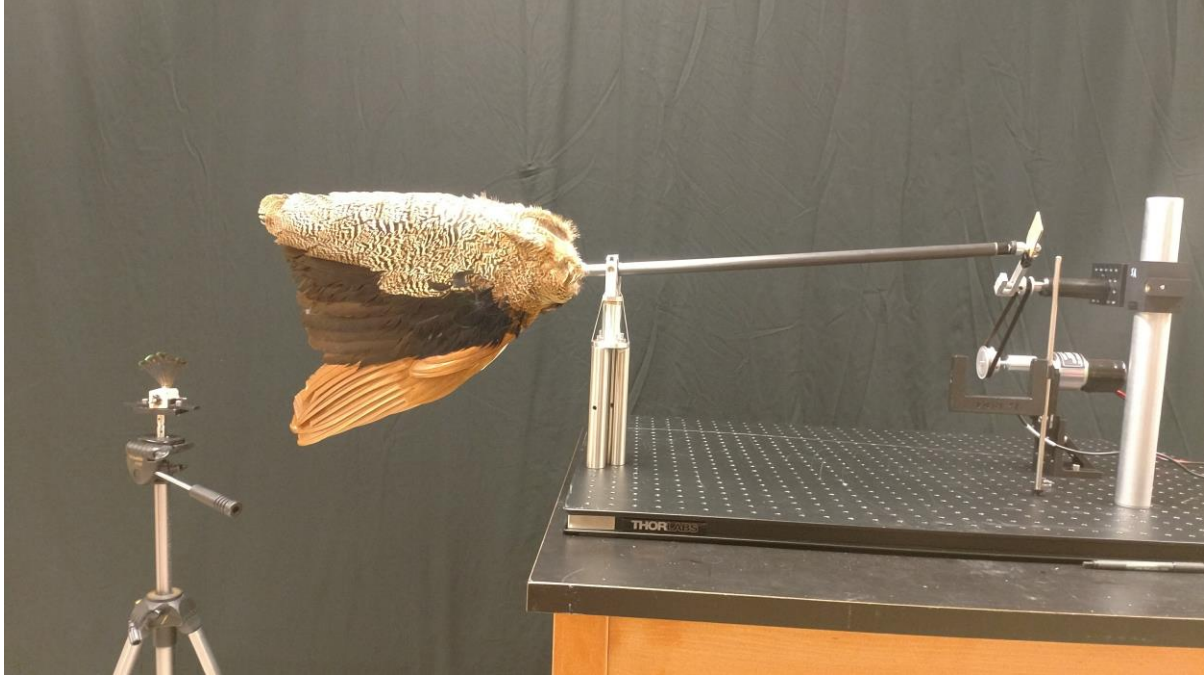

**S3 Fig. Robotic apparatus for simulating peacock wing-shaking.** Peacock wing-shaking displays were simulated using a peacock wing mounted on a carbon fiber rod. The rod was rotated at approximately 5 Hz (a typical wing-shaking frequency) about a clevis joint located at the wing's shoulder joint, ensuring that the plane of the wing's surface remained vertical while the tips circumscribed a 14 cm diameter circle. Peahen crests were positioned in the region of maximum airflow at distances  $\leq 90$  cm (50 cm shown here) from the wingtips. The resulting crest motion was filmed using high-speed video.
