# Supplementary material for: Biomechanics of the peafowl’s crest reveals frequencies tuned to social displays
Source: PubMed Central journal article supplement (PMC6261573; doi:10.1371/journal.pone.0207247), 2018-11-28
Supplement: pone.0207247.s011.pdf [file pone.0207247.s011.pdf]

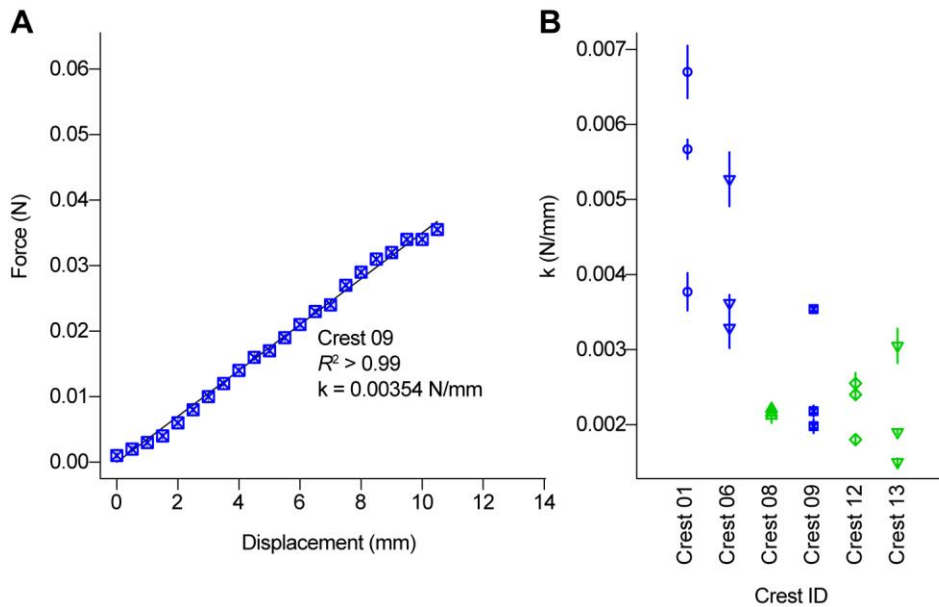

**S4 Fig. Bending spring constant,  $k$ , of peafowl crests.** Force-displacement trials were performed three times each for  $n = 3$  male and  $n = 3$  female crests, respectively. The bending spring constant,  $k$ , was calculated from the slope of linear model fits to the resulting force-displacement data from each trial. The example in (A) shows data from a single trial on peacock Crest 09 to illustrate the linearity of the response, with symbols scaled to span y-axis measurement error. (B) Values of  $k$  from each of three trials on the total  $n = 6$  crests. Each crest sample is denoted by a different symbol-color combination, following Figs. 2-3 of the main text, and ordered left to right by decreasing mean  $k$  value. Blue data are male (peacock) crests and green data are female (peahen) crests.
